# Supplementary material
Source: HighWire-hosted journal article supplement (https://www.highwirestage.com/highwire/filestream/97556/field_highwire_adjunct_files/0/1259.pdf)
Supplement: 1259.pdf [file 1259.pdf]

Supplementary Images

| Patient | T2                                                                                  | FLAIR                                                                               | Patient | T2                                                                                   | FLAIR                                                                                 |
|---------|-------------------------------------------------------------------------------------|-------------------------------------------------------------------------------------|---------|--------------------------------------------------------------------------------------|---------------------------------------------------------------------------------------|
| A       | 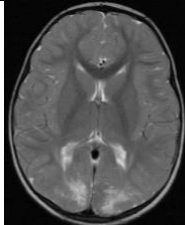   |    | G       |    |    |
| B       |    |    | J       |    |    |
| C       |   |   | K       |   |   |
| D       |  |  | L       |  |  |
| E       |  |  | M       |  |  |
|         |                                                                                     |                                                                                     |         |                                                                                      |                                                                                       |

**Table A.** Axial T2-weighted and FLAIR sequence images of ten patients with documented pure neonatal hypoglycemic brain injury. Note the predominant parieto-occipital cortical injuries as well as distinct sparing of the thalami with absent thalamus L-sign.

| 1                                                                                  | 2                                                                                  | 3                                                                                  | 4                                                                                   | 5                                                                                    |
|------------------------------------------------------------------------------------|------------------------------------------------------------------------------------|------------------------------------------------------------------------------------|-------------------------------------------------------------------------------------|--------------------------------------------------------------------------------------|
| 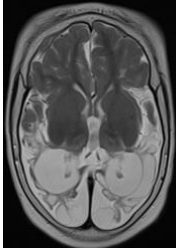  |   |   |   |   |
|                                                                                    |                                                                                    |                                                                                    |                                                                                     |                                                                                      |
| 6                                                                                  | 7                                                                                  | 8                                                                                  | 9                                                                                   | 10                                                                                   |
|  |  |  |  |  |
|                                                                                    |                                                                                    |                                                                                    |                                                                                     |                                                                                      |

**Table B.** The third group comprising patients with combined hypoxic-ischemic and hypoglycemic brain injury. Note the presence of the thalamus L-sign and the cortical watershed injuries.
